# Supplementary material for: MARS-seq2.0: an experimental and analytical pipeline for indexed sorting combined with single-cell RNA sequencing
Source: Springer Nature journal article supplement (doi:10.1038/s41596-019-0164-4), 2019-05-17
Supplement: MOESM4 [file 41596_2019_164_MOESM4_ESM.xlsx]

## Sheet: MARS-seq2.0_RT1 primers
WellPosition	Name	Barcode	RT1 primer
A1	v3_gr1	CTATTCG	CGATTGAGGCCGGTAATACGACTCACTATAGGGGCGACGTGTGCTCTTCCGATCTCTATTCGNNNNNNNNTTTTTTTTTTTTTTTTTTTTN
B1	v3_gr1	ACTCAGG	CGATTGAGGCCGGTAATACGACTCACTATAGGGGCGACGTGTGCTCTTCCGATCTACTCAGGNNNNNNNNTTTTTTTTTTTTTTTTTTTTN
C1	v3_gr1	ACACGTG	CGATTGAGGCCGGTAATACGACTCACTATAGGGGCGACGTGTGCTCTTCCGATCTACACGTGNNNNNNNNTTTTTTTTTTTTTTTTTTTTN
D1	v3_gr1	TCTTCGA	CGATTGAGGCCGGTAATACGACTCACTATAGGGGCGACGTGTGCTCTTCCGATCTTCTTCGANNNNNNNNTTTTTTTTTTTTTTTTTTTTN
E1	v3_gr1	AGCACTG	CGATTGAGGCCGGTAATACGACTCACTATAGGGGCGACGTGTGCTCTTCCGATCTAGCACTGNNNNNNNNTTTTTTTTTTTTTTTTTTTTN
F1	v3_gr1	AGTGCGT	CGATTGAGGCCGGTAATACGACTCACTATAGGGGCGACGTGTGCTCTTCCGATCTAGTGCGTNNNNNNNNTTTTTTTTTTTTTTTTTTTTN
G1	v3_gr1	AACGTTC	CGATTGAGGCCGGTAATACGACTCACTATAGGGGCGACGTGTGCTCTTCCGATCTAACGTTCNNNNNNNNTTTTTTTTTTTTTTTTTTTTN
H1	v3_gr1	ATCTGTC	CGATTGAGGCCGGTAATACGACTCACTATAGGGGCGACGTGTGCTCTTCCGATCTATCTGTCNNNNNNNNTTTTTTTTTTTTTTTTTTTTN
A2	v3_gr1	GTATGCG	CGATTGAGGCCGGTAATACGACTCACTATAGGGGCGACGTGTGCTCTTCCGATCTGTATGCGNNNNNNNNTTTTTTTTTTTTTTTTTTTTN
B2	v3_gr1	ATCTGCA	CGATTGAGGCCGGTAATACGACTCACTATAGGGGCGACGTGTGCTCTTCCGATCTATCTGCANNNNNNNNTTTTTTTTTTTTTTTTTTTTN
C2	v3_gr1	GCAGTAG	CGATTGAGGCCGGTAATACGACTCACTATAGGGGCGACGTGTGCTCTTCCGATCTGCAGTAGNNNNNNNNTTTTTTTTTTTTTTTTTTTTN
D2	v3_gr1	CAGTACG	CGATTGAGGCCGGTAATACGACTCACTATAGGGGCGACGTGTGCTCTTCCGATCTCAGTACGNNNNNNNNTTTTTTTTTTTTTTTTTTTTN
E2	v3_gr1	TGCACAA	CGATTGAGGCCGGTAATACGACTCACTATAGGGGCGACGTGTGCTCTTCCGATCTTGCACAANNNNNNNNTTTTTTTTTTTTTTTTTTTTN
F2	v3_gr1	CGTAACT	CGATTGAGGCCGGTAATACGACTCACTATAGGGGCGACGTGTGCTCTTCCGATCTCGTAACTNNNNNNNNTTTTTTTTTTTTTTTTTTTTN
G2	v3_gr1	AGCTCAA	CGATTGAGGCCGGTAATACGACTCACTATAGGGGCGACGTGTGCTCTTCCGATCTAGCTCAANNNNNNNNTTTTTTTTTTTTTTTTTTTTN
H2	v3_gr1	ATAACCG	CGATTGAGGCCGGTAATACGACTCACTATAGGGGCGACGTGTGCTCTTCCGATCTATAACCGNNNNNNNNTTTTTTTTTTTTTTTTTTTTN
A3	v3_gr1	TGTCACG	CGATTGAGGCCGGTAATACGACTCACTATAGGGGCGACGTGTGCTCTTCCGATCTTGTCACGNNNNNNNNTTTTTTTTTTTTTTTTTTTTN
B3	v3_gr1	TTCCTGA	CGATTGAGGCCGGTAATACGACTCACTATAGGGGCGACGTGTGCTCTTCCGATCTTTCCTGANNNNNNNNTTTTTTTTTTTTTTTTTTTTN
C3	v3_gr1	GGATCTA	CGATTGAGGCCGGTAATACGACTCACTATAGGGGCGACGTGTGCTCTTCCGATCTGGATCTANNNNNNNNTTTTTTTTTTTTTTTTTTTTN
D3	v3_gr1	TACCAGT	CGATTGAGGCCGGTAATACGACTCACTATAGGGGCGACGTGTGCTCTTCCGATCTTACCAGTNNNNNNNNTTTTTTTTTTTTTTTTTTTTN
E3	v3_gr1	GGAGACT	CGATTGAGGCCGGTAATACGACTCACTATAGGGGCGACGTGTGCTCTTCCGATCTGGAGACTNNNNNNNNTTTTTTTTTTTTTTTTTTTTN
F3	v3_gr1	AGCTAGT	CGATTGAGGCCGGTAATACGACTCACTATAGGGGCGACGTGTGCTCTTCCGATCTAGCTAGTNNNNNNNNTTTTTTTTTTTTTTTTTTTTN
G3	v3_gr1	ACTTGGC	CGATTGAGGCCGGTAATACGACTCACTATAGGGGCGACGTGTGCTCTTCCGATCTACTTGGCNNNNNNNNTTTTTTTTTTTTTTTTTTTTN
H3	v3_gr1	TAGCGCA	CGATTGAGGCCGGTAATACGACTCACTATAGGGGCGACGTGTGCTCTTCCGATCTTAGCGCANNNNNNNNTTTTTTTTTTTTTTTTTTTTN
A4	v3_gr1	CCTAAGG	CGATTGAGGCCGGTAATACGACTCACTATAGGGGCGACGTGTGCTCTTCCGATCTCCTAAGGNNNNNNNNTTTTTTTTTTTTTTTTTTTTN
B4	v3_gr1	GGCGATT	CGATTGAGGCCGGTAATACGACTCACTATAGGGGCGACGTGTGCTCTTCCGATCTGGCGATTNNNNNNNNTTTTTTTTTTTTTTTTTTTTN
C4	v3_gr1	GCTGAAT	CGATTGAGGCCGGTAATACGACTCACTATAGGGGCGACGTGTGCTCTTCCGATCTGCTGAATNNNNNNNNTTTTTTTTTTTTTTTTTTTTN
D4	v3_gr1	GAATAGC	CGATTGAGGCCGGTAATACGACTCACTATAGGGGCGACGTGTGCTCTTCCGATCTGAATAGCNNNNNNNNTTTTTTTTTTTTTTTTTTTTN
E4	v3_gr1	ACTGCAG	CGATTGAGGCCGGTAATACGACTCACTATAGGGGCGACGTGTGCTCTTCCGATCTACTGCAGNNNNNNNNTTTTTTTTTTTTTTTTTTTTN
F4	v3_gr1	CTTACGG	CGATTGAGGCCGGTAATACGACTCACTATAGGGGCGACGTGTGCTCTTCCGATCTCTTACGGNNNNNNNNTTTTTTTTTTTTTTTTTTTTN
G4	v3_gr1	CGCATAT	CGATTGAGGCCGGTAATACGACTCACTATAGGGGCGACGTGTGCTCTTCCGATCTCGCATATNNNNNNNNTTTTTTTTTTTTTTTTTTTTN
H4	v3_gr1	GCCTACA	CGATTGAGGCCGGTAATACGACTCACTATAGGGGCGACGTGTGCTCTTCCGATCTGCCTACANNNNNNNNTTTTTTTTTTTTTTTTTTTTN
A5	v3_gr1	TTCAAGC	CGATTGAGGCCGGTAATACGACTCACTATAGGGGCGACGTGTGCTCTTCCGATCTTTCAAGCNNNNNNNNTTTTTTTTTTTTTTTTTTTTN
B5	v3_gr1	CTGTGAG	CGATTGAGGCCGGTAATACGACTCACTATAGGGGCGACGTGTGCTCTTCCGATCTCTGTGAGNNNNNNNNTTTTTTTTTTTTTTTTTTTTN
C5	v3_gr1	CTAGTGC	CGATTGAGGCCGGTAATACGACTCACTATAGGGGCGACGTGTGCTCTTCCGATCTCTAGTGCNNNNNNNNTTTTTTTTTTTTTTTTTTTTN
D5	v3_gr1	CTTGCAG	CGATTGAGGCCGGTAATACGACTCACTATAGGGGCGACGTGTGCTCTTCCGATCTCTTGCAGNNNNNNNNTTTTTTTTTTTTTTTTTTTTN
E5	v3_gr1	ATGCCAA	CGATTGAGGCCGGTAATACGACTCACTATAGGGGCGACGTGTGCTCTTCCGATCTATGCCAANNNNNNNNTTTTTTTTTTTTTTTTTTTTN
F5	v3_gr1	CATGCTG	CGATTGAGGCCGGTAATACGACTCACTATAGGGGCGACGTGTGCTCTTCCGATCTCATGCTGNNNNNNNNTTTTTTTTTTTTTTTTTTTTN
G5	v3_gr1	CTAAGCG	CGATTGAGGCCGGTAATACGACTCACTATAGGGGCGACGTGTGCTCTTCCGATCTCTAAGCGNNNNNNNNTTTTTTTTTTTTTTTTTTTTN
H5	v3_gr1	AGCCGAT	CGATTGAGGCCGGTAATACGACTCACTATAGGGGCGACGTGTGCTCTTCCGATCTAGCCGATNNNNNNNNTTTTTTTTTTTTTTTTTTTTN
A6	v3_gr1	CGCTTGA	CGATTGAGGCCGGTAATACGACTCACTATAGGGGCGACGTGTGCTCTTCCGATCTCGCTTGANNNNNNNNTTTTTTTTTTTTTTTTTTTTN
B6	v3_gr1	GATCACA	CGATTGAGGCCGGTAATACGACTCACTATAGGGGCGACGTGTGCTCTTCCGATCTGATCACANNNNNNNNTTTTTTTTTTTTTTTTTTTTN
C6	v3_gr1	GTGCTAT	CGATTGAGGCCGGTAATACGACTCACTATAGGGGCGACGTGTGCTCTTCCGATCTGTGCTATNNNNNNNNTTTTTTTTTTTTTTTTTTTTN
D6	v3_gr1	AGGCTAG	CGATTGAGGCCGGTAATACGACTCACTATAGGGGCGACGTGTGCTCTTCCGATCTAGGCTAGNNNNNNNNTTTTTTTTTTTTTTTTTTTTN
E6	v3_gr1	CTACGTA	CGATTGAGGCCGGTAATACGACTCACTATAGGGGCGACGTGTGCTCTTCCGATCTCTACGTANNNNNNNNTTTTTTTTTTTTTTTTTTTTN
F6	v3_gr1	ATAGCGA	CGATTGAGGCCGGTAATACGACTCACTATAGGGGCGACGTGTGCTCTTCCGATCTATAGCGANNNNNNNNTTTTTTTTTTTTTTTTTTTTN
G6	v3_gr1	GTAGTCT	CGATTGAGGCCGGTAATACGACTCACTATAGGGGCGACGTGTGCTCTTCCGATCTGTAGTCTNNNNNNNNTTTTTTTTTTTTTTTTTTTTN
H6	v3_gr1	CTACAAG	CGATTGAGGCCGGTAATACGACTCACTATAGGGGCGACGTGTGCTCTTCCGATCTCTACAAGNNNNNNNNTTTTTTTTTTTTTTTTTTTTN
A7	v3_gr1	CATGAAC	CGATTGAGGCCGGTAATACGACTCACTATAGGGGCGACGTGTGCTCTTCCGATCTCATGAACNNNNNNNNTTTTTTTTTTTTTTTTTTTTN
B7	v3_gr1	TACTAGC	CGATTGAGGCCGGTAATACGACTCACTATAGGGGCGACGTGTGCTCTTCCGATCTTACTAGCNNNNNNNNTTTTTTTTTTTTTTTTTTTTN
C7	v3_gr1	GCAACTA	CGATTGAGGCCGGTAATACGACTCACTATAGGGGCGACGTGTGCTCTTCCGATCTGCAACTANNNNNNNNTTTTTTTTTTTTTTTTTTTTN
D7	v3_gr1	AGGCGTT	CGATTGAGGCCGGTAATACGACTCACTATAGGGGCGACGTGTGCTCTTCCGATCTAGGCGTTNNNNNNNNTTTTTTTTTTTTTTTTTTTTN
E7	v3_gr1	CGCTACA	CGATTGAGGCCGGTAATACGACTCACTATAGGGGCGACGTGTGCTCTTCCGATCTCGCTACANNNNNNNNTTTTTTTTTTTTTTTTTTTTN
F7	v3_gr1	AAGGTAC	CGATTGAGGCCGGTAATACGACTCACTATAGGGGCGACGTGTGCTCTTCCGATCTAAGGTACNNNNNNNNTTTTTTTTTTTTTTTTTTTTN
G7	v3_gr1	AAGCCTT	CGATTGAGGCCGGTAATACGACTCACTATAGGGGCGACGTGTGCTCTTCCGATCTAAGCCTTNNNNNNNNTTTTTTTTTTTTTTTTTTTTN
H7	v3_gr1	CTACAGC	CGATTGAGGCCGGTAATACGACTCACTATAGGGGCGACGTGTGCTCTTCCGATCTCTACAGCNNNNNNNNTTTTTTTTTTTTTTTTTTTTN
A8	v3_gr1	CTTAGTG	CGATTGAGGCCGGTAATACGACTCACTATAGGGGCGACGTGTGCTCTTCCGATCTCTTAGTGNNNNNNNNTTTTTTTTTTTTTTTTTTTTN
B8	v3_gr1	GGCTAGA	CGATTGAGGCCGGTAATACGACTCACTATAGGGGCGACGTGTGCTCTTCCGATCTGGCTAGANNNNNNNNTTTTTTTTTTTTTTTTTTTTN
C8	v3_gr1	TTGCCAG	CGATTGAGGCCGGTAATACGACTCACTATAGGGGCGACGTGTGCTCTTCCGATCTTTGCCAGNNNNNNNNTTTTTTTTTTTTTTTTTTTTN
D8	v3_gr1	CGTTGAA	CGATTGAGGCCGGTAATACGACTCACTATAGGGGCGACGTGTGCTCTTCCGATCTCGTTGAANNNNNNNNTTTTTTTTTTTTTTTTTTTTN
E8	v3_gr1	TCGAAGG	CGATTGAGGCCGGTAATACGACTCACTATAGGGGCGACGTGTGCTCTTCCGATCTTCGAAGGNNNNNNNNTTTTTTTTTTTTTTTTTTTTN
F8	v3_gr1	TATAGGC	CGATTGAGGCCGGTAATACGACTCACTATAGGGGCGACGTGTGCTCTTCCGATCTTATAGGCNNNNNNNNTTTTTTTTTTTTTTTTTTTTN
G8	v3_gr1	AACAGCT	CGATTGAGGCCGGTAATACGACTCACTATAGGGGCGACGTGTGCTCTTCCGATCTAACAGCTNNNNNNNNTTTTTTTTTTTTTTTTTTTTN
H8	v3_gr1	TCACAAG	CGATTGAGGCCGGTAATACGACTCACTATAGGGGCGACGTGTGCTCTTCCGATCTTCACAAGNNNNNNNNTTTTTTTTTTTTTTTTTTTTN
A9	v3_gr1	TGGAGCA	CGATTGAGGCCGGTAATACGACTCACTATAGGGGCGACGTGTGCTCTTCCGATCTTGGAGCANNNNNNNNTTTTTTTTTTTTTTTTTTTTN
B9	v3_gr1	CAATCGA	CGATTGAGGCCGGTAATACGACTCACTATAGGGGCGACGTGTGCTCTTCCGATCTCAATCGANNNNNNNNTTTTTTTTTTTTTTTTTTTTN
C9	v3_gr1	TTGCAGA	CGATTGAGGCCGGTAATACGACTCACTATAGGGGCGACGTGTGCTCTTCCGATCTTTGCAGANNNNNNNNTTTTTTTTTTTTTTTTTTTTN
D9	v3_gr1	ACCGATC	CGATTGAGGCCGGTAATACGACTCACTATAGGGGCGACGTGTGCTCTTCCGATCTACCGATCNNNNNNNNTTTTTTTTTTTTTTTTTTTTN
E9	v3_gr1	CTGATGG	CGATTGAGGCCGGTAATACGACTCACTATAGGGGCGACGTGTGCTCTTCCGATCTCTGATGGNNNNNNNNTTTTTTTTTTTTTTTTTTTTN
F9	v3_gr1	GCTTAGA	CGATTGAGGCCGGTAATACGACTCACTATAGGGGCGACGTGTGCTCTTCCGATCTGCTTAGANNNNNNNNTTTTTTTTTTTTTTTTTTTTN
G9	v3_gr1	TACGAGG	CGATTGAGGCCGGTAATACGACTCACTATAGGGGCGACGTGTGCTCTTCCGATCTTACGAGGNNNNNNNNTTTTTTTTTTTTTTTTTTTTN
H9	v3_gr1	AACGGTG	CGATTGAGGCCGGTAATACGACTCACTATAGGGGCGACGTGTGCTCTTCCGATCTAACGGTGNNNNNNNNTTTTTTTTTTTTTTTTTTTTN
A10	v3_gr1	AGTCTCC	CGATTGAGGCCGGTAATACGACTCACTATAGGGGCGACGTGTGCTCTTCCGATCTAGTCTCCNNNNNNNNTTTTTTTTTTTTTTTTTTTTN
B10	v3_gr1	GACACTG	CGATTGAGGCCGGTAATACGACTCACTATAGGGGCGACGTGTGCTCTTCCGATCTGACACTGNNNNNNNNTTTTTTTTTTTTTTTTTTTTN
C10	v3_gr1	ATCAGGC	CGATTGAGGCCGGTAATACGACTCACTATAGGGGCGACGTGTGCTCTTCCGATCTATCAGGCNNNNNNNNTTTTTTTTTTTTTTTTTTTTN
D10	v3_gr1	CGGATTA	CGATTGAGGCCGGTAATACGACTCACTATAGGGGCGACGTGTGCTCTTCCGATCTCGGATTANNNNNNNNTTTTTTTTTTTTTTTTTTTTN
E10	v3_gr1	TCTCGAA	CGATTGAGGCCGGTAATACGACTCACTATAGGGGCGACGTGTGCTCTTCCGATCTTCTCGAANNNNNNNNTTTTTTTTTTTTTTTTTTTTN
F10	v3_gr1	ACGCTAT	CGATTGAGGCCGGTAATACGACTCACTATAGGGGCGACGTGTGCTCTTCCGATCTACGCTATNNNNNNNNTTTTTTTTTTTTTTTTTTTTN
G10	v3_gr1	TCGATAC	CGATTGAGGCCGGTAATACGACTCACTATAGGGGCGACGTGTGCTCTTCCGATCTTCGATACNNNNNNNNTTTTTTTTTTTTTTTTTTTTN
H10	v3_gr1	TGACGGA	CGATTGAGGCCGGTAATACGACTCACTATAGGGGCGACGTGTGCTCTTCCGATCTTGACGGANNNNNNNNTTTTTTTTTTTTTTTTTTTTN
A11	v3_gr1	GCTTCAT	CGATTGAGGCCGGTAATACGACTCACTATAGGGGCGACGTGTGCTCTTCCGATCTGCTTCATNNNNNNNNTTTTTTTTTTTTTTTTTTTTN
B11	v3_gr1	GGCACTT	CGATTGAGGCCGGTAATACGACTCACTATAGGGGCGACGTGTGCTCTTCCGATCTGGCACTTNNNNNNNNTTTTTTTTTTTTTTTTTTTTN
C11	v3_gr1	CGAGTCT	CGATTGAGGCCGGTAATACGACTCACTATAGGGGCGACGTGTGCTCTTCCGATCTCGAGTCTNNNNNNNNTTTTTTTTTTTTTTTTTTTTN
D11	v3_gr1	CAGTCAA	CGATTGAGGCCGGTAATACGACTCACTATAGGGGCGACGTGTGCTCTTCCGATCTCAGTCAANNNNNNNNTTTTTTTTTTTTTTTTTTTTN
E11	v3_gr1	TGCCTAA	CGATTGAGGCCGGTAATACGACTCACTATAGGGGCGACGTGTGCTCTTCCGATCTTGCCTAANNNNNNNNTTTTTTTTTTTTTTTTTTTTN
F11	v3_gr1	CCTGACT	CGATTGAGGCCGGTAATACGACTCACTATAGGGGCGACGTGTGCTCTTCCGATCTCCTGACTNNNNNNNNTTTTTTTTTTTTTTTTTTTTN
G11	v3_gr1	TCTGGAG	CGATTGAGGCCGGTAATACGACTCACTATAGGGGCGACGTGTGCTCTTCCGATCTTCTGGAGNNNNNNNNTTTTTTTTTTTTTTTTTTTTN
H11	v3_gr1	AACTCGT	CGATTGAGGCCGGTAATACGACTCACTATAGGGGCGACGTGTGCTCTTCCGATCTAACTCGTNNNNNNNNTTTTTTTTTTTTTTTTTTTTN
A12	v3_gr1	CCTGATG	CGATTGAGGCCGGTAATACGACTCACTATAGGGGCGACGTGTGCTCTTCCGATCTCCTGATGNNNNNNNNTTTTTTTTTTTTTTTTTTTTN
B12	v3_gr1	CACAGAT	CGATTGAGGCCGGTAATACGACTCACTATAGGGGCGACGTGTGCTCTTCCGATCTCACAGATNNNNNNNNTTTTTTTTTTTTTTTTTTTTN
C12	v3_gr1	CTTCGAA	CGATTGAGGCCGGTAATACGACTCACTATAGGGGCGACGTGTGCTCTTCCGATCTCTTCGAANNNNNNNNTTTTTTTTTTTTTTTTTTTTN
D12	v3_gr1	CGTCAGA	CGATTGAGGCCGGTAATACGACTCACTATAGGGGCGACGTGTGCTCTTCCGATCTCGTCAGANNNNNNNNTTTTTTTTTTTTTTTTTTTTN
E12	v3_gr1	TCGACTC	CGATTGAGGCCGGTAATACGACTCACTATAGGGGCGACGTGTGCTCTTCCGATCTTCGACTCNNNNNNNNTTTTTTTTTTTTTTTTTTTTN
F12	v3_gr1	CCATGGT	CGATTGAGGCCGGTAATACGACTCACTATAGGGGCGACGTGTGCTCTTCCGATCTCCATGGTNNNNNNNNTTTTTTTTTTTTTTTTTTTTN
G12	v3_gr1	TACGTAC	CGATTGAGGCCGGTAATACGACTCACTATAGGGGCGACGTGTGCTCTTCCGATCTTACGTACNNNNNNNNTTTTTTTTTTTTTTTTTTTTN
H12	v3_gr1	TACCGGA	CGATTGAGGCCGGTAATACGACTCACTATAGGGGCGACGTGTGCTCTTCCGATCTTACCGGANNNNNNNNTTTTTTTTTTTTTTTTTTTTN
A1	v3_gr2	AGAGCAT	CGATTGAGGCCGGTAATACGACTCACTATAGGGGCGACGTGTGCTCTTCCGATCTAGAGCATNNNNNNNNTTTTTTTTTTTTTTTTTTTTN
B1	v3_gr2	GTCATGC	CGATTGAGGCCGGTAATACGACTCACTATAGGGGCGACGTGTGCTCTTCCGATCTGTCATGCNNNNNNNNTTTTTTTTTTTTTTTTTTTTN
C1	v3_gr2	ACGCTTC	CGATTGAGGCCGGTAATACGACTCACTATAGGGGCGACGTGTGCTCTTCCGATCTACGCTTCNNNNNNNNTTTTTTTTTTTTTTTTTTTTN
D1	v3_gr2	TCTTAGG	CGATTGAGGCCGGTAATACGACTCACTATAGGGGCGACGTGTGCTCTTCCGATCTTCTTAGGNNNNNNNNTTTTTTTTTTTTTTTTTTTTN
E1	v3_gr2	TGATGAC	CGATTGAGGCCGGTAATACGACTCACTATAGGGGCGACGTGTGCTCTTCCGATCTTGATGACNNNNNNNNTTTTTTTTTTTTTTTTTTTTN
F1	v3_gr2	GTAAGTC	CGATTGAGGCCGGTAATACGACTCACTATAGGGGCGACGTGTGCTCTTCCGATCTGTAAGTCNNNNNNNNTTTTTTTTTTTTTTTTTTTTN
G1	v3_gr2	ATCTACG	CGATTGAGGCCGGTAATACGACTCACTATAGGGGCGACGTGTGCTCTTCCGATCTATCTACGNNNNNNNNTTTTTTTTTTTTTTTTTTTTN
H1	v3_gr2	GTACGGT	CGATTGAGGCCGGTAATACGACTCACTATAGGGGCGACGTGTGCTCTTCCGATCTGTACGGTNNNNNNNNTTTTTTTTTTTTTTTTTTTTN
A2	v3_gr2	GGTCTTA	CGATTGAGGCCGGTAATACGACTCACTATAGGGGCGACGTGTGCTCTTCCGATCTGGTCTTANNNNNNNNTTTTTTTTTTTTTTTTTTTTN
B2	v3_gr2	CGGTCTA	CGATTGAGGCCGGTAATACGACTCACTATAGGGGCGACGTGTGCTCTTCCGATCTCGGTCTANNNNNNNNTTTTTTTTTTTTTTTTTTTTN
C2	v3_gr2	TGAGCAG	CGATTGAGGCCGGTAATACGACTCACTATAGGGGCGACGTGTGCTCTTCCGATCTTGAGCAGNNNNNNNNTTTTTTTTTTTTTTTTTTTTN
D2	v3_gr2	GCATGAT	CGATTGAGGCCGGTAATACGACTCACTATAGGGGCGACGTGTGCTCTTCCGATCTGCATGATNNNNNNNNTTTTTTTTTTTTTTTTTTTTN
E2	v3_gr2	GAGCTAG	CGATTGAGGCCGGTAATACGACTCACTATAGGGGCGACGTGTGCTCTTCCGATCTGAGCTAGNNNNNNNNTTTTTTTTTTTTTTTTTTTTN
F2	v3_gr2	CATTGTC	CGATTGAGGCCGGTAATACGACTCACTATAGGGGCGACGTGTGCTCTTCCGATCTCATTGTCNNNNNNNNTTTTTTTTTTTTTTTTTTTTN
G2	v3_gr2	GTTAGGC	CGATTGAGGCCGGTAATACGACTCACTATAGGGGCGACGTGTGCTCTTCCGATCTGTTAGGCNNNNNNNNTTTTTTTTTTTTTTTTTTTTN
H2	v3_gr2	CTTAAGC	CGATTGAGGCCGGTAATACGACTCACTATAGGGGCGACGTGTGCTCTTCCGATCTCTTAAGCNNNNNNNNTTTTTTTTTTTTTTTTTTTTN
A3	v3_gr2	GGTTCAA	CGATTGAGGCCGGTAATACGACTCACTATAGGGGCGACGTGTGCTCTTCCGATCTGGTTCAANNNNNNNNTTTTTTTTTTTTTTTTTTTTN
B3	v3_gr2	CAAGGTT	CGATTGAGGCCGGTAATACGACTCACTATAGGGGCGACGTGTGCTCTTCCGATCTCAAGGTTNNNNNNNNTTTTTTTTTTTTTTTTTTTTN
C3	v3_gr2	ACTGTCC	CGATTGAGGCCGGTAATACGACTCACTATAGGGGCGACGTGTGCTCTTCCGATCTACTGTCCNNNNNNNNTTTTTTTTTTTTTTTTTTTTN
D3	v3_gr2	TCTAACG	CGATTGAGGCCGGTAATACGACTCACTATAGGGGCGACGTGTGCTCTTCCGATCTTCTAACGNNNNNNNNTTTTTTTTTTTTTTTTTTTTN
E3	v3_gr2	AGTCGAC	CGATTGAGGCCGGTAATACGACTCACTATAGGGGCGACGTGTGCTCTTCCGATCTAGTCGACNNNNNNNNTTTTTTTTTTTTTTTTTTTTN
F3	v3_gr2	AACATCG	CGATTGAGGCCGGTAATACGACTCACTATAGGGGCGACGTGTGCTCTTCCGATCTAACATCGNNNNNNNNTTTTTTTTTTTTTTTTTTTTN
G3	v3_gr2	CCATTGC	CGATTGAGGCCGGTAATACGACTCACTATAGGGGCGACGTGTGCTCTTCCGATCTCCATTGCNNNNNNNNTTTTTTTTTTTTTTTTTTTTN
H3	v3_gr2	TGCTACT	CGATTGAGGCCGGTAATACGACTCACTATAGGGGCGACGTGTGCTCTTCCGATCTTGCTACTNNNNNNNNTTTTTTTTTTTTTTTTTTTTN
A4	v3_gr2	CTGGAAG	CGATTGAGGCCGGTAATACGACTCACTATAGGGGCGACGTGTGCTCTTCCGATCTCTGGAAGNNNNNNNNTTTTTTTTTTTTTTTTTTTTN
B4	v3_gr2	ATAGCCT	CGATTGAGGCCGGTAATACGACTCACTATAGGGGCGACGTGTGCTCTTCCGATCTATAGCCTNNNNNNNNTTTTTTTTTTTTTTTTTTTTN
C4	v3_gr2	GTAACGT	CGATTGAGGCCGGTAATACGACTCACTATAGGGGCGACGTGTGCTCTTCCGATCTGTAACGTNNNNNNNNTTTTTTTTTTTTTTTTTTTTN
D4	v3_gr2	CACGAGT	CGATTGAGGCCGGTAATACGACTCACTATAGGGGCGACGTGTGCTCTTCCGATCTCACGAGTNNNNNNNNTTTTTTTTTTTTTTTTTTTTN
E4	v3_gr2	AGTACCT	CGATTGAGGCCGGTAATACGACTCACTATAGGGGCGACGTGTGCTCTTCCGATCTAGTACCTNNNNNNNNTTTTTTTTTTTTTTTTTTTTN
F4	v3_gr2	CTGTATG	CGATTGAGGCCGGTAATACGACTCACTATAGGGGCGACGTGTGCTCTTCCGATCTCTGTATGNNNNNNNNTTTTTTTTTTTTTTTTTTTTN
G4	v3_gr2	CTCATGA	CGATTGAGGCCGGTAATACGACTCACTATAGGGGCGACGTGTGCTCTTCCGATCTCTCATGANNNNNNNNTTTTTTTTTTTTTTTTTTTTN
H4	v3_gr2	AGATCAC	CGATTGAGGCCGGTAATACGACTCACTATAGGGGCGACGTGTGCTCTTCCGATCTAGATCACNNNNNNNNTTTTTTTTTTTTTTTTTTTTN
A5	v3_gr2	GATAGTC	CGATTGAGGCCGGTAATACGACTCACTATAGGGGCGACGTGTGCTCTTCCGATCTGATAGTCNNNNNNNNTTTTTTTTTTTTTTTTTTTTN
B5	v3_gr2	GACCTGT	CGATTGAGGCCGGTAATACGACTCACTATAGGGGCGACGTGTGCTCTTCCGATCTGACCTGTNNNNNNNNTTTTTTTTTTTTTTTTTTTTN
C5	v3_gr2	CATGAGG	CGATTGAGGCCGGTAATACGACTCACTATAGGGGCGACGTGTGCTCTTCCGATCTCATGAGGNNNNNNNNTTTTTTTTTTTTTTTTTTTTN
D5	v3_gr2	CAACGGT	CGATTGAGGCCGGTAATACGACTCACTATAGGGGCGACGTGTGCTCTTCCGATCTCAACGGTNNNNNNNNTTTTTTTTTTTTTTTTTTTTN
E5	v3_gr2	CGATATC	CGATTGAGGCCGGTAATACGACTCACTATAGGGGCGACGTGTGCTCTTCCGATCTCGATATCNNNNNNNNTTTTTTTTTTTTTTTTTTTTN
F5	v3_gr2	GAGATCG	CGATTGAGGCCGGTAATACGACTCACTATAGGGGCGACGTGTGCTCTTCCGATCTGAGATCGNNNNNNNNTTTTTTTTTTTTTTTTTTTTN
G5	v3_gr2	GCTGACA	CGATTGAGGCCGGTAATACGACTCACTATAGGGGCGACGTGTGCTCTTCCGATCTGCTGACANNNNNNNNTTTTTTTTTTTTTTTTTTTTN
H5	v3_gr2	TTGGTCA	CGATTGAGGCCGGTAATACGACTCACTATAGGGGCGACGTGTGCTCTTCCGATCTTTGGTCANNNNNNNNTTTTTTTTTTTTTTTTTTTTN
A6	v3_gr2	GCATCAG	CGATTGAGGCCGGTAATACGACTCACTATAGGGGCGACGTGTGCTCTTCCGATCTGCATCAGNNNNNNNNTTTTTTTTTTTTTTTTTTTTN
B6	v3_gr2	TGCTGAG	CGATTGAGGCCGGTAATACGACTCACTATAGGGGCGACGTGTGCTCTTCCGATCTTGCTGAGNNNNNNNNTTTTTTTTTTTTTTTTTTTTN
C6	v3_gr2	ACGTTGG	CGATTGAGGCCGGTAATACGACTCACTATAGGGGCGACGTGTGCTCTTCCGATCTACGTTGGNNNNNNNNTTTTTTTTTTTTTTTTTTTTN
D6	v3_gr2	GACTGTG	CGATTGAGGCCGGTAATACGACTCACTATAGGGGCGACGTGTGCTCTTCCGATCTGACTGTGNNNNNNNNTTTTTTTTTTTTTTTTTTTTN
E6	v3_gr2	GACGCTA	CGATTGAGGCCGGTAATACGACTCACTATAGGGGCGACGTGTGCTCTTCCGATCTGACGCTANNNNNNNNTTTTTTTTTTTTTTTTTTTTN
F6	v3_gr2	TCGTGAG	CGATTGAGGCCGGTAATACGACTCACTATAGGGGCGACGTGTGCTCTTCCGATCTTCGTGAGNNNNNNNNTTTTTTTTTTTTTTTTTTTTN
G6	v3_gr2	ACGGATA	CGATTGAGGCCGGTAATACGACTCACTATAGGGGCGACGTGTGCTCTTCCGATCTACGGATANNNNNNNNTTTTTTTTTTTTTTTTTTTTN
H6	v3_gr2	CAGCGTA	CGATTGAGGCCGGTAATACGACTCACTATAGGGGCGACGTGTGCTCTTCCGATCTCAGCGTANNNNNNNNTTTTTTTTTTTTTTTTTTTTN
A7	v3_gr2	TACGACT	CGATTGAGGCCGGTAATACGACTCACTATAGGGGCGACGTGTGCTCTTCCGATCTTACGACTNNNNNNNNTTTTTTTTTTTTTTTTTTTTN
B7	v3_gr2	CGTGCAT	CGATTGAGGCCGGTAATACGACTCACTATAGGGGCGACGTGTGCTCTTCCGATCTCGTGCATNNNNNNNNTTTTTTTTTTTTTTTTTTTTN
C7	v3_gr2	AATGCCG	CGATTGAGGCCGGTAATACGACTCACTATAGGGGCGACGTGTGCTCTTCCGATCTAATGCCGNNNNNNNNTTTTTTTTTTTTTTTTTTTTN
D7	v3_gr2	AGCTGTT	CGATTGAGGCCGGTAATACGACTCACTATAGGGGCGACGTGTGCTCTTCCGATCTAGCTGTTNNNNNNNNTTTTTTTTTTTTTTTTTTTTN
E7	v3_gr2	GCATCGT	CGATTGAGGCCGGTAATACGACTCACTATAGGGGCGACGTGTGCTCTTCCGATCTGCATCGTNNNNNNNNTTTTTTTTTTTTTTTTTTTTN
F7	v3_gr2	CATGGAT	CGATTGAGGCCGGTAATACGACTCACTATAGGGGCGACGTGTGCTCTTCCGATCTCATGGATNNNNNNNNTTTTTTTTTTTTTTTTTTTTN
G7	v3_gr2	ATTCCGT	CGATTGAGGCCGGTAATACGACTCACTATAGGGGCGACGTGTGCTCTTCCGATCTATTCCGTNNNNNNNNTTTTTTTTTTTTTTTTTTTTN
H7	v3_gr2	CATACAG	CGATTGAGGCCGGTAATACGACTCACTATAGGGGCGACGTGTGCTCTTCCGATCTCATACAGNNNNNNNNTTTTTTTTTTTTTTTTTTTTN
A8	v3_gr2	TATGTCC	CGATTGAGGCCGGTAATACGACTCACTATAGGGGCGACGTGTGCTCTTCCGATCTTATGTCCNNNNNNNNTTTTTTTTTTTTTTTTTTTTN
B8	v3_gr2	TACCGAT	CGATTGAGGCCGGTAATACGACTCACTATAGGGGCGACGTGTGCTCTTCCGATCTTACCGATNNNNNNNNTTTTTTTTTTTTTTTTTTTTN
C8	v3_gr2	GCATCCA	CGATTGAGGCCGGTAATACGACTCACTATAGGGGCGACGTGTGCTCTTCCGATCTGCATCCANNNNNNNNTTTTTTTTTTTTTTTTTTTTN
D8	v3_gr2	CGTACTC	CGATTGAGGCCGGTAATACGACTCACTATAGGGGCGACGTGTGCTCTTCCGATCTCGTACTCNNNNNNNNTTTTTTTTTTTTTTTTTTTTN
E8	v3_gr2	AGCAGGT	CGATTGAGGCCGGTAATACGACTCACTATAGGGGCGACGTGTGCTCTTCCGATCTAGCAGGTNNNNNNNNTTTTTTTTTTTTTTTTTTTTN
F8	v3_gr2	CATTGGA	CGATTGAGGCCGGTAATACGACTCACTATAGGGGCGACGTGTGCTCTTCCGATCTCATTGGANNNNNNNNTTTTTTTTTTTTTTTTTTTTN
G8	v3_gr2	GCATGGA	CGATTGAGGCCGGTAATACGACTCACTATAGGGGCGACGTGTGCTCTTCCGATCTGCATGGANNNNNNNNTTTTTTTTTTTTTTTTTTTTN
H8	v3_gr2	CGAAGGT	CGATTGAGGCCGGTAATACGACTCACTATAGGGGCGACGTGTGCTCTTCCGATCTCGAAGGTNNNNNNNNTTTTTTTTTTTTTTTTTTTTN
A9	v3_gr2	GTAATCC	CGATTGAGGCCGGTAATACGACTCACTATAGGGGCGACGTGTGCTCTTCCGATCTGTAATCCNNNNNNNNTTTTTTTTTTTTTTTTTTTTN
B9	v3_gr2	GTCACAC	CGATTGAGGCCGGTAATACGACTCACTATAGGGGCGACGTGTGCTCTTCCGATCTGTCACACNNNNNNNNTTTTTTTTTTTTTTTTTTTTN
C9	v3_gr2	TTCAGTC	CGATTGAGGCCGGTAATACGACTCACTATAGGGGCGACGTGTGCTCTTCCGATCTTTCAGTCNNNNNNNNTTTTTTTTTTTTTTTTTTTTN
D9	v3_gr2	ACAATCG	CGATTGAGGCCGGTAATACGACTCACTATAGGGGCGACGTGTGCTCTTCCGATCTACAATCGNNNNNNNNTTTTTTTTTTTTTTTTTTTTN
E9	v3_gr2	CATGTGC	CGATTGAGGCCGGTAATACGACTCACTATAGGGGCGACGTGTGCTCTTCCGATCTCATGTGCNNNNNNNNTTTTTTTTTTTTTTTTTTTTN
F9	v3_gr2	ATGACGT	CGATTGAGGCCGGTAATACGACTCACTATAGGGGCGACGTGTGCTCTTCCGATCTATGACGTNNNNNNNNTTTTTTTTTTTTTTTTTTTTN
G9	v3_gr2	GGAACCT	CGATTGAGGCCGGTAATACGACTCACTATAGGGGCGACGTGTGCTCTTCCGATCTGGAACCTNNNNNNNNTTTTTTTTTTTTTTTTTTTTN
H9	v3_gr2	ACAGGTA	CGATTGAGGCCGGTAATACGACTCACTATAGGGGCGACGTGTGCTCTTCCGATCTACAGGTANNNNNNNNTTTTTTTTTTTTTTTTTTTTN
A10	v3_gr2	TCAGCCT	CGATTGAGGCCGGTAATACGACTCACTATAGGGGCGACGTGTGCTCTTCCGATCTTCAGCCTNNNNNNNNTTTTTTTTTTTTTTTTTTTTN
B10	v3_gr2	CACAGTA	CGATTGAGGCCGGTAATACGACTCACTATAGGGGCGACGTGTGCTCTTCCGATCTCACAGTANNNNNNNNTTTTTTTTTTTTTTTTTTTTN
C10	v3_gr2	GTCGAGA	CGATTGAGGCCGGTAATACGACTCACTATAGGGGCGACGTGTGCTCTTCCGATCTGTCGAGANNNNNNNNTTTTTTTTTTTTTTTTTTTTN
D10	v3_gr2	AGATGCG	CGATTGAGGCCGGTAATACGACTCACTATAGGGGCGACGTGTGCTCTTCCGATCTAGATGCGNNNNNNNNTTTTTTTTTTTTTTTTTTTTN
E10	v3_gr2	GCATACT	CGATTGAGGCCGGTAATACGACTCACTATAGGGGCGACGTGTGCTCTTCCGATCTGCATACTNNNNNNNNTTTTTTTTTTTTTTTTTTTTN
F10	v3_gr2	TAGACCA	CGATTGAGGCCGGTAATACGACTCACTATAGGGGCGACGTGTGCTCTTCCGATCTTAGACCANNNNNNNNTTTTTTTTTTTTTTTTTTTTN
G10	v3_gr2	TAGGCAT	CGATTGAGGCCGGTAATACGACTCACTATAGGGGCGACGTGTGCTCTTCCGATCTTAGGCATNNNNNNNNTTTTTTTTTTTTTTTTTTTTN
H10	v3_gr2	GTTGACT	CGATTGAGGCCGGTAATACGACTCACTATAGGGGCGACGTGTGCTCTTCCGATCTGTTGACTNNNNNNNNTTTTTTTTTTTTTTTTTTTTN
A11	v3_gr2	GGACTTC	CGATTGAGGCCGGTAATACGACTCACTATAGGGGCGACGTGTGCTCTTCCGATCTGGACTTCNNNNNNNNTTTTTTTTTTTTTTTTTTTTN
B11	v3_gr2	GCTCATA	CGATTGAGGCCGGTAATACGACTCACTATAGGGGCGACGTGTGCTCTTCCGATCTGCTCATANNNNNNNNTTTTTTTTTTTTTTTTTTTTN
C11	v3_gr2	GTTCAAC	CGATTGAGGCCGGTAATACGACTCACTATAGGGGCGACGTGTGCTCTTCCGATCTGTTCAACNNNNNNNNTTTTTTTTTTTTTTTTTTTTN
D11	v3_gr2	ACGATGC	CGATTGAGGCCGGTAATACGACTCACTATAGGGGCGACGTGTGCTCTTCCGATCTACGATGCNNNNNNNNTTTTTTTTTTTTTTTTTTTTN
E11	v3_gr2	TGAGACC	CGATTGAGGCCGGTAATACGACTCACTATAGGGGCGACGTGTGCTCTTCCGATCTTGAGACCNNNNNNNNTTTTTTTTTTTTTTTTTTTTN
F11	v3_gr2	GGTCCAT	CGATTGAGGCCGGTAATACGACTCACTATAGGGGCGACGTGTGCTCTTCCGATCTGGTCCATNNNNNNNNTTTTTTTTTTTTTTTTTTTTN
G11	v3_gr2	GGTGATC	CGATTGAGGCCGGTAATACGACTCACTATAGGGGCGACGTGTGCTCTTCCGATCTGGTGATCNNNNNNNNTTTTTTTTTTTTTTTTTTTTN
H11	v3_gr2	CAATGCG	CGATTGAGGCCGGTAATACGACTCACTATAGGGGCGACGTGTGCTCTTCCGATCTCAATGCGNNNNNNNNTTTTTTTTTTTTTTTTTTTTN
A12	v3_gr2	CAGGAAT	CGATTGAGGCCGGTAATACGACTCACTATAGGGGCGACGTGTGCTCTTCCGATCTCAGGAATNNNNNNNNTTTTTTTTTTTTTTTTTTTTN
B12	v3_gr2	GCCATTC	CGATTGAGGCCGGTAATACGACTCACTATAGGGGCGACGTGTGCTCTTCCGATCTGCCATTCNNNNNNNNTTTTTTTTTTTTTTTTTTTTN
C12	v3_gr2	TGGACAC	CGATTGAGGCCGGTAATACGACTCACTATAGGGGCGACGTGTGCTCTTCCGATCTTGGACACNNNNNNNNTTTTTTTTTTTTTTTTTTTTN
D12	v3_gr2	GTTACCT	CGATTGAGGCCGGTAATACGACTCACTATAGGGGCGACGTGTGCTCTTCCGATCTGTTACCTNNNNNNNNTTTTTTTTTTTTTTTTTTTTN
E12	v3_gr2	CTTGTAC	CGATTGAGGCCGGTAATACGACTCACTATAGGGGCGACGTGTGCTCTTCCGATCTCTTGTACNNNNNNNNTTTTTTTTTTTTTTTTTTTTN
F12	v3_gr2	ATAGGTC	CGATTGAGGCCGGTAATACGACTCACTATAGGGGCGACGTGTGCTCTTCCGATCTATAGGTCNNNNNNNNTTTTTTTTTTTTTTTTTTTTN
G12	v3_gr2	ATGGCTC	CGATTGAGGCCGGTAATACGACTCACTATAGGGGCGACGTGTGCTCTTCCGATCTATGGCTCNNNNNNNNTTTTTTTTTTTTTTTTTTTTN
H12	v3_gr2	CAACATG	CGATTGAGGCCGGTAATACGACTCACTATAGGGGCGACGTGTGCTCTTCCGATCTCAACATGNNNNNNNNTTTTTTTTTTTTTTTTTTTTN
A1	v3_gr3	TGATCCG	CGATTGAGGCCGGTAATACGACTCACTATAGGGGCGACGTGTGCTCTTCCGATCTTGATCCGNNNNNNNNTTTTTTTTTTTTTTTTTTTTN
B1	v3_gr3	TACTCGA	CGATTGAGGCCGGTAATACGACTCACTATAGGGGCGACGTGTGCTCTTCCGATCTTACTCGANNNNNNNNTTTTTTTTTTTTTTTTTTTTN
C1	v3_gr3	TTAGCGT	CGATTGAGGCCGGTAATACGACTCACTATAGGGGCGACGTGTGCTCTTCCGATCTTTAGCGTNNNNNNNNTTTTTTTTTTTTTTTTTTTTN
D1	v3_gr3	AACCTTG	CGATTGAGGCCGGTAATACGACTCACTATAGGGGCGACGTGTGCTCTTCCGATCTAACCTTGNNNNNNNNTTTTTTTTTTTTTTTTTTTTN
E1	v3_gr3	CACGTCA	CGATTGAGGCCGGTAATACGACTCACTATAGGGGCGACGTGTGCTCTTCCGATCTCACGTCANNNNNNNNTTTTTTTTTTTTTTTTTTTTN
F1	v3_gr3	CCGCATT	CGATTGAGGCCGGTAATACGACTCACTATAGGGGCGACGTGTGCTCTTCCGATCTCCGCATTNNNNNNNNTTTTTTTTTTTTTTTTTTTTN
G1	v3_gr3	TGTGACT	CGATTGAGGCCGGTAATACGACTCACTATAGGGGCGACGTGTGCTCTTCCGATCTTGTGACTNNNNNNNNTTTTTTTTTTTTTTTTTTTTN
H1	v3_gr3	CGTACGT	CGATTGAGGCCGGTAATACGACTCACTATAGGGGCGACGTGTGCTCTTCCGATCTCGTACGTNNNNNNNNTTTTTTTTTTTTTTTTTTTTN
A2	v3_gr3	TGACGTC	CGATTGAGGCCGGTAATACGACTCACTATAGGGGCGACGTGTGCTCTTCCGATCTTGACGTCNNNNNNNNTTTTTTTTTTTTTTTTTTTTN
B2	v3_gr3	GCTACCA	CGATTGAGGCCGGTAATACGACTCACTATAGGGGCGACGTGTGCTCTTCCGATCTGCTACCANNNNNNNNTTTTTTTTTTTTTTTTTTTTN
C2	v3_gr3	GGACGAT	CGATTGAGGCCGGTAATACGACTCACTATAGGGGCGACGTGTGCTCTTCCGATCTGGACGATNNNNNNNNTTTTTTTTTTTTTTTTTTTTN
D2	v3_gr3	GACATCC	CGATTGAGGCCGGTAATACGACTCACTATAGGGGCGACGTGTGCTCTTCCGATCTGACATCCNNNNNNNNTTTTTTTTTTTTTTTTTTTTN
E2	v3_gr3	CTAGCTC	CGATTGAGGCCGGTAATACGACTCACTATAGGGGCGACGTGTGCTCTTCCGATCTCTAGCTCNNNNNNNNTTTTTTTTTTTTTTTTTTTTN
F2	v3_gr3	GATGTAC	CGATTGAGGCCGGTAATACGACTCACTATAGGGGCGACGTGTGCTCTTCCGATCTGATGTACNNNNNNNNTTTTTTTTTTTTTTTTTTTTN
G2	v3_gr3	TCGCCAA	CGATTGAGGCCGGTAATACGACTCACTATAGGGGCGACGTGTGCTCTTCCGATCTTCGCCAANNNNNNNNTTTTTTTTTTTTTTTTTTTTN
H2	v3_gr3	ACTCGGT	CGATTGAGGCCGGTAATACGACTCACTATAGGGGCGACGTGTGCTCTTCCGATCTACTCGGTNNNNNNNNTTTTTTTTTTTTTTTTTTTTN
A3	v3_gr3	ATGCTAC	CGATTGAGGCCGGTAATACGACTCACTATAGGGGCGACGTGTGCTCTTCCGATCTATGCTACNNNNNNNNTTTTTTTTTTTTTTTTTTTTN
B3	v3_gr3	GGTATCA	CGATTGAGGCCGGTAATACGACTCACTATAGGGGCGACGTGTGCTCTTCCGATCTGGTATCANNNNNNNNTTTTTTTTTTTTTTTTTTTTN
C3	v3_gr3	GCTACTC	CGATTGAGGCCGGTAATACGACTCACTATAGGGGCGACGTGTGCTCTTCCGATCTGCTACTCNNNNNNNNTTTTTTTTTTTTTTTTTTTTN
D3	v3_gr3	AGGACAT	CGATTGAGGCCGGTAATACGACTCACTATAGGGGCGACGTGTGCTCTTCCGATCTAGGACATNNNNNNNNTTTTTTTTTTTTTTTTTTTTN
E3	v3_gr3	CTATCGT	CGATTGAGGCCGGTAATACGACTCACTATAGGGGCGACGTGTGCTCTTCCGATCTCTATCGTNNNNNNNNTTTTTTTTTTTTTTTTTTTTN
F3	v3_gr3	TGCACTC	CGATTGAGGCCGGTAATACGACTCACTATAGGGGCGACGTGTGCTCTTCCGATCTTGCACTCNNNNNNNNTTTTTTTTTTTTTTTTTTTTN
G3	v3_gr3	GATGCTC	CGATTGAGGCCGGTAATACGACTCACTATAGGGGCGACGTGTGCTCTTCCGATCTGATGCTCNNNNNNNNTTTTTTTTTTTTTTTTTTTTN
H3	v3_gr3	GACGTAG	CGATTGAGGCCGGTAATACGACTCACTATAGGGGCGACGTGTGCTCTTCCGATCTGACGTAGNNNNNNNNTTTTTTTTTTTTTTTTTTTTN
A4	v3_gr3	AGGTTCG	CGATTGAGGCCGGTAATACGACTCACTATAGGGGCGACGTGTGCTCTTCCGATCTAGGTTCGNNNNNNNNTTTTTTTTTTTTTTTTTTTTN
B4	v3_gr3	GAACCTC	CGATTGAGGCCGGTAATACGACTCACTATAGGGGCGACGTGTGCTCTTCCGATCTGAACCTCNNNNNNNNTTTTTTTTTTTTTTTTTTTTN
C4	v3_gr3	AGTGTAC	CGATTGAGGCCGGTAATACGACTCACTATAGGGGCGACGTGTGCTCTTCCGATCTAGTGTACNNNNNNNNTTTTTTTTTTTTTTTTTTTTN
D4	v3_gr3	CTCGATC	CGATTGAGGCCGGTAATACGACTCACTATAGGGGCGACGTGTGCTCTTCCGATCTCTCGATCNNNNNNNNTTTTTTTTTTTTTTTTTTTTN
E4	v3_gr3	GCTTGTA	CGATTGAGGCCGGTAATACGACTCACTATAGGGGCGACGTGTGCTCTTCCGATCTGCTTGTANNNNNNNNTTTTTTTTTTTTTTTTTTTTN
F4	v3_gr3	ATCGTGA	CGATTGAGGCCGGTAATACGACTCACTATAGGGGCGACGTGTGCTCTTCCGATCTATCGTGANNNNNNNNTTTTTTTTTTTTTTTTTTTTN
G4	v3_gr3	CGTATGA	CGATTGAGGCCGGTAATACGACTCACTATAGGGGCGACGTGTGCTCTTCCGATCTCGTATGANNNNNNNNTTTTTTTTTTTTTTTTTTTTN
H4	v3_gr3	GTGTCTA	CGATTGAGGCCGGTAATACGACTCACTATAGGGGCGACGTGTGCTCTTCCGATCTGTGTCTANNNNNNNNTTTTTTTTTTTTTTTTTTTTN
A5	v3_gr3	GCTACGT	CGATTGAGGCCGGTAATACGACTCACTATAGGGGCGACGTGTGCTCTTCCGATCTGCTACGTNNNNNNNNTTTTTTTTTTTTTTTTTTTTN
B5	v3_gr3	TCACTGA	CGATTGAGGCCGGTAATACGACTCACTATAGGGGCGACGTGTGCTCTTCCGATCTTCACTGANNNNNNNNTTTTTTTTTTTTTTTTTTTTN
C5	v3_gr3	CGCAATC	CGATTGAGGCCGGTAATACGACTCACTATAGGGGCGACGTGTGCTCTTCCGATCTCGCAATCNNNNNNNNTTTTTTTTTTTTTTTTTTTTN
D5	v3_gr3	TTGCACC	CGATTGAGGCCGGTAATACGACTCACTATAGGGGCGACGTGTGCTCTTCCGATCTTTGCACCNNNNNNNNTTTTTTTTTTTTTTTTTTTTN
E5	v3_gr3	TCTACAG	CGATTGAGGCCGGTAATACGACTCACTATAGGGGCGACGTGTGCTCTTCCGATCTTCTACAGNNNNNNNNTTTTTTTTTTTTTTTTTTTTN
F5	v3_gr3	GACCTAA	CGATTGAGGCCGGTAATACGACTCACTATAGGGGCGACGTGTGCTCTTCCGATCTGACCTAANNNNNNNNTTTTTTTTTTTTTTTTTTTTN
G5	v3_gr3	CAGCACT	CGATTGAGGCCGGTAATACGACTCACTATAGGGGCGACGTGTGCTCTTCCGATCTCAGCACTNNNNNNNNTTTTTTTTTTTTTTTTTTTTN
H5	v3_gr3	ATGAGCG	CGATTGAGGCCGGTAATACGACTCACTATAGGGGCGACGTGTGCTCTTCCGATCTATGAGCGNNNNNNNNTTTTTTTTTTTTTTTTTTTTN
A6	v3_gr3	CGGATGT	CGATTGAGGCCGGTAATACGACTCACTATAGGGGCGACGTGTGCTCTTCCGATCTCGGATGTNNNNNNNNTTTTTTTTTTTTTTTTTTTTN
B6	v3_gr3	CTTCAGT	CGATTGAGGCCGGTAATACGACTCACTATAGGGGCGACGTGTGCTCTTCCGATCTCTTCAGTNNNNNNNNTTTTTTTTTTTTTTTTTTTTN
C6	v3_gr3	TCTCATG	CGATTGAGGCCGGTAATACGACTCACTATAGGGGCGACGTGTGCTCTTCCGATCTTCTCATGNNNNNNNNTTTTTTTTTTTTTTTTTTTTN
D6	v3_gr3	TTGCCTA	CGATTGAGGCCGGTAATACGACTCACTATAGGGGCGACGTGTGCTCTTCCGATCTTTGCCTANNNNNNNNTTTTTTTTTTTTTTTTTTTTN
E6	v3_gr3	TATCCGC	CGATTGAGGCCGGTAATACGACTCACTATAGGGGCGACGTGTGCTCTTCCGATCTTATCCGCNNNNNNNNTTTTTTTTTTTTTTTTTTTTN
F6	v3_gr3	TAACAGC	CGATTGAGGCCGGTAATACGACTCACTATAGGGGCGACGTGTGCTCTTCCGATCTTAACAGCNNNNNNNNTTTTTTTTTTTTTTTTTTTTN
G6	v3_gr3	CCGAAGT	CGATTGAGGCCGGTAATACGACTCACTATAGGGGCGACGTGTGCTCTTCCGATCTCCGAAGTNNNNNNNNTTTTTTTTTTTTTTTTTTTTN
H6	v3_gr3	CGAGTGA	CGATTGAGGCCGGTAATACGACTCACTATAGGGGCGACGTGTGCTCTTCCGATCTCGAGTGANNNNNNNNTTTTTTTTTTTTTTTTTTTTN
A7	v3_gr3	CGATGAT	CGATTGAGGCCGGTAATACGACTCACTATAGGGGCGACGTGTGCTCTTCCGATCTCGATGATNNNNNNNNTTTTTTTTTTTTTTTTTTTTN
B7	v3_gr3	AATCACG	CGATTGAGGCCGGTAATACGACTCACTATAGGGGCGACGTGTGCTCTTCCGATCTAATCACGNNNNNNNNTTTTTTTTTTTTTTTTTTTTN
C7	v3_gr3	TACTGAC	CGATTGAGGCCGGTAATACGACTCACTATAGGGGCGACGTGTGCTCTTCCGATCTTACTGACNNNNNNNNTTTTTTTTTTTTTTTTTTTTN
D7	v3_gr3	ACAGCTC	CGATTGAGGCCGGTAATACGACTCACTATAGGGGCGACGTGTGCTCTTCCGATCTACAGCTCNNNNNNNNTTTTTTTTTTTTTTTTTTTTN
E7	v3_gr3	TGCACGT	CGATTGAGGCCGGTAATACGACTCACTATAGGGGCGACGTGTGCTCTTCCGATCTTGCACGTNNNNNNNNTTTTTTTTTTTTTTTTTTTTN
F7	v3_gr3	GCCATAG	CGATTGAGGCCGGTAATACGACTCACTATAGGGGCGACGTGTGCTCTTCCGATCTGCCATAGNNNNNNNNTTTTTTTTTTTTTTTTTTTTN
G7	v3_gr3	CGCATTG	CGATTGAGGCCGGTAATACGACTCACTATAGGGGCGACGTGTGCTCTTCCGATCTCGCATTGNNNNNNNNTTTTTTTTTTTTTTTTTTTTN
H7	v3_gr3	GAGACTA	CGATTGAGGCCGGTAATACGACTCACTATAGGGGCGACGTGTGCTCTTCCGATCTGAGACTANNNNNNNNTTTTTTTTTTTTTTTTTTTTN
A8	v3_gr3	AGCTGGA	CGATTGAGGCCGGTAATACGACTCACTATAGGGGCGACGTGTGCTCTTCCGATCTAGCTGGANNNNNNNNTTTTTTTTTTTTTTTTTTTTN
B8	v3_gr3	GCTTAAG	CGATTGAGGCCGGTAATACGACTCACTATAGGGGCGACGTGTGCTCTTCCGATCTGCTTAAGNNNNNNNNTTTTTTTTTTTTTTTTTTTTN
C8	v3_gr3	GCCGTAA	CGATTGAGGCCGGTAATACGACTCACTATAGGGGCGACGTGTGCTCTTCCGATCTGCCGTAANNNNNNNNTTTTTTTTTTTTTTTTTTTTN
D8	v3_gr3	ATCCAGG	CGATTGAGGCCGGTAATACGACTCACTATAGGGGCGACGTGTGCTCTTCCGATCTATCCAGGNNNNNNNNTTTTTTTTTTTTTTTTTTTTN
E8	v3_gr3	ACACTGG	CGATTGAGGCCGGTAATACGACTCACTATAGGGGCGACGTGTGCTCTTCCGATCTACACTGGNNNNNNNNTTTTTTTTTTTTTTTTTTTTN
F8	v3_gr3	GTTGCAC	CGATTGAGGCCGGTAATACGACTCACTATAGGGGCGACGTGTGCTCTTCCGATCTGTTGCACNNNNNNNNTTTTTTTTTTTTTTTTTTTTN
G8	v3_gr3	TCAGTGG	CGATTGAGGCCGGTAATACGACTCACTATAGGGGCGACGTGTGCTCTTCCGATCTTCAGTGGNNNNNNNNTTTTTTTTTTTTTTTTTTTTN
H8	v3_gr3	GGTATGC	CGATTGAGGCCGGTAATACGACTCACTATAGGGGCGACGTGTGCTCTTCCGATCTGGTATGCNNNNNNNNTTTTTTTTTTTTTTTTTTTTN
A9	v3_gr3	GTTGCTA	CGATTGAGGCCGGTAATACGACTCACTATAGGGGCGACGTGTGCTCTTCCGATCTGTTGCTANNNNNNNNTTTTTTTTTTTTTTTTTTTTN
B9	v3_gr3	AAGTGCA	CGATTGAGGCCGGTAATACGACTCACTATAGGGGCGACGTGTGCTCTTCCGATCTAAGTGCANNNNNNNNTTTTTTTTTTTTTTTTTTTTN
C9	v3_gr3	GCGACAT	CGATTGAGGCCGGTAATACGACTCACTATAGGGGCGACGTGTGCTCTTCCGATCTGCGACATNNNNNNNNTTTTTTTTTTTTTTTTTTTTN
D9	v3_gr3	GTCGTCA	CGATTGAGGCCGGTAATACGACTCACTATAGGGGCGACGTGTGCTCTTCCGATCTGTCGTCANNNNNNNNTTTTTTTTTTTTTTTTTTTTN
E9	v3_gr3	ACATCCG	CGATTGAGGCCGGTAATACGACTCACTATAGGGGCGACGTGTGCTCTTCCGATCTACATCCGNNNNNNNNTTTTTTTTTTTTTTTTTTTTN
F9	v3_gr3	GGTCTAG	CGATTGAGGCCGGTAATACGACTCACTATAGGGGCGACGTGTGCTCTTCCGATCTGGTCTAGNNNNNNNNTTTTTTTTTTTTTTTTTTTTN
G9	v3_gr3	TAATGCC	CGATTGAGGCCGGTAATACGACTCACTATAGGGGCGACGTGTGCTCTTCCGATCTTAATGCCNNNNNNNNTTTTTTTTTTTTTTTTTTTTN
H9	v3_gr3	CAACTGA	CGATTGAGGCCGGTAATACGACTCACTATAGGGGCGACGTGTGCTCTTCCGATCTCAACTGANNNNNNNNTTTTTTTTTTTTTTTTTTTTN
A10	v3_gr3	CGAGATT	CGATTGAGGCCGGTAATACGACTCACTATAGGGGCGACGTGTGCTCTTCCGATCTCGAGATTNNNNNNNNTTTTTTTTTTTTTTTTTTTTN
B10	v3_gr3	CGTTACG	CGATTGAGGCCGGTAATACGACTCACTATAGGGGCGACGTGTGCTCTTCCGATCTCGTTACGNNNNNNNNTTTTTTTTTTTTTTTTTTTTN
C10	v3_gr3	CGACGTT	CGATTGAGGCCGGTAATACGACTCACTATAGGGGCGACGTGTGCTCTTCCGATCTCGACGTTNNNNNNNNTTTTTTTTTTTTTTTTTTTTN
D10	v3_gr3	ACATGCT	CGATTGAGGCCGGTAATACGACTCACTATAGGGGCGACGTGTGCTCTTCCGATCTACATGCTNNNNNNNNTTTTTTTTTTTTTTTTTTTTN
E10	v3_gr3	GCAATTG	CGATTGAGGCCGGTAATACGACTCACTATAGGGGCGACGTGTGCTCTTCCGATCTGCAATTGNNNNNNNNTTTTTTTTTTTTTTTTTTTTN
F10	v3_gr3	ACGTGGT	CGATTGAGGCCGGTAATACGACTCACTATAGGGGCGACGTGTGCTCTTCCGATCTACGTGGTNNNNNNNNTTTTTTTTTTTTTTTTTTTTN
G10	v3_gr3	CAGTTCA	CGATTGAGGCCGGTAATACGACTCACTATAGGGGCGACGTGTGCTCTTCCGATCTCAGTTCANNNNNNNNTTTTTTTTTTTTTTTTTTTTN
H10	v3_gr3	TTCATGG	CGATTGAGGCCGGTAATACGACTCACTATAGGGGCGACGTGTGCTCTTCCGATCTTTCATGGNNNNNNNNTTTTTTTTTTTTTTTTTTTTN
A11	v3_gr3	CGTCCAA	CGATTGAGGCCGGTAATACGACTCACTATAGGGGCGACGTGTGCTCTTCCGATCTCGTCCAANNNNNNNNTTTTTTTTTTTTTTTTTTTTN
B11	v3_gr3	TGAATCC	CGATTGAGGCCGGTAATACGACTCACTATAGGGGCGACGTGTGCTCTTCCGATCTTGAATCCNNNNNNNNTTTTTTTTTTTTTTTTTTTTN
C11	v3_gr3	GGCATAC	CGATTGAGGCCGGTAATACGACTCACTATAGGGGCGACGTGTGCTCTTCCGATCTGGCATACNNNNNNNNTTTTTTTTTTTTTTTTTTTTN
D11	v3_gr3	AAGGCTA	CGATTGAGGCCGGTAATACGACTCACTATAGGGGCGACGTGTGCTCTTCCGATCTAAGGCTANNNNNNNNTTTTTTTTTTTTTTTTTTTTN
E11	v3_gr3	TATCGCG	CGATTGAGGCCGGTAATACGACTCACTATAGGGGCGACGTGTGCTCTTCCGATCTTATCGCGNNNNNNNNTTTTTTTTTTTTTTTTTTTTN
F11	v3_gr3	CGAACTT	CGATTGAGGCCGGTAATACGACTCACTATAGGGGCGACGTGTGCTCTTCCGATCTCGAACTTNNNNNNNNTTTTTTTTTTTTTTTTTTTTN
G11	v3_gr3	CTAGACG	CGATTGAGGCCGGTAATACGACTCACTATAGGGGCGACGTGTGCTCTTCCGATCTCTAGACGNNNNNNNNTTTTTTTTTTTTTTTTTTTTN
H11	v3_gr3	TCCGCAT	CGATTGAGGCCGGTAATACGACTCACTATAGGGGCGACGTGTGCTCTTCCGATCTTCCGCATNNNNNNNNTTTTTTTTTTTTTTTTTTTTN
A12	v3_gr3	GAGCTTC	CGATTGAGGCCGGTAATACGACTCACTATAGGGGCGACGTGTGCTCTTCCGATCTGAGCTTCNNNNNNNNTTTTTTTTTTTTTTTTTTTTN
B12	v3_gr3	GATCGCT	CGATTGAGGCCGGTAATACGACTCACTATAGGGGCGACGTGTGCTCTTCCGATCTGATCGCTNNNNNNNNTTTTTTTTTTTTTTTTTTTTN
C12	v3_gr3	TGTCTCA	CGATTGAGGCCGGTAATACGACTCACTATAGGGGCGACGTGTGCTCTTCCGATCTTGTCTCANNNNNNNNTTTTTTTTTTTTTTTTTTTTN
D12	v3_gr3	CCATGAC	CGATTGAGGCCGGTAATACGACTCACTATAGGGGCGACGTGTGCTCTTCCGATCTCCATGACNNNNNNNNTTTTTTTTTTTTTTTTTTTTN
E12	v3_gr3	CATCTGG	CGATTGAGGCCGGTAATACGACTCACTATAGGGGCGACGTGTGCTCTTCCGATCTCATCTGGNNNNNNNNTTTTTTTTTTTTTTTTTTTTN
F12	v3_gr3	TACGGTC	CGATTGAGGCCGGTAATACGACTCACTATAGGGGCGACGTGTGCTCTTCCGATCTTACGGTCNNNNNNNNTTTTTTTTTTTTTTTTTTTTN
G12	v3_gr3	CGAGTAG	CGATTGAGGCCGGTAATACGACTCACTATAGGGGCGACGTGTGCTCTTCCGATCTCGAGTAGNNNNNNNNTTTTTTTTTTTTTTTTTTTTN
H12	v3_gr3	GACACCT	CGATTGAGGCCGGTAATACGACTCACTATAGGGGCGACGTGTGCTCTTCCGATCTGACACCTNNNNNNNNTTTTTTTTTTTTTTTTTTTTN
A1	v3_gr4	GAGTTCT	CGATTGAGGCCGGTAATACGACTCACTATAGGGGCGACGTGTGCTCTTCCGATCTGAGTTCTNNNNNNNNTTTTTTTTTTTTTTTTTTTTN
B1	v3_gr4	TTCAGGA	CGATTGAGGCCGGTAATACGACTCACTATAGGGGCGACGTGTGCTCTTCCGATCTTTCAGGANNNNNNNNTTTTTTTTTTTTTTTTTTTTN
C1	v3_gr4	GACGTCT	CGATTGAGGCCGGTAATACGACTCACTATAGGGGCGACGTGTGCTCTTCCGATCTGACGTCTNNNNNNNNTTTTTTTTTTTTTTTTTTTTN
D1	v3_gr4	TCACTTG	CGATTGAGGCCGGTAATACGACTCACTATAGGGGCGACGTGTGCTCTTCCGATCTTCACTTGNNNNNNNNTTTTTTTTTTTTTTTTTTTTN
E1	v3_gr4	AGATACC	CGATTGAGGCCGGTAATACGACTCACTATAGGGGCGACGTGTGCTCTTCCGATCTAGATACCNNNNNNNNTTTTTTTTTTTTTTTTTTTTN
F1	v3_gr4	CTTGACC	CGATTGAGGCCGGTAATACGACTCACTATAGGGGCGACGTGTGCTCTTCCGATCTCTTGACCNNNNNNNNTTTTTTTTTTTTTTTTTTTTN
G1	v3_gr4	GGAATCG	CGATTGAGGCCGGTAATACGACTCACTATAGGGGCGACGTGTGCTCTTCCGATCTGGAATCGNNNNNNNNTTTTTTTTTTTTTTTTTTTTN
H1	v3_gr4	CGTGAGT	CGATTGAGGCCGGTAATACGACTCACTATAGGGGCGACGTGTGCTCTTCCGATCTCGTGAGTNNNNNNNNTTTTTTTTTTTTTTTTTTTTN
A2	v3_gr4	AGTTCGC	CGATTGAGGCCGGTAATACGACTCACTATAGGGGCGACGTGTGCTCTTCCGATCTAGTTCGCNNNNNNNNTTTTTTTTTTTTTTTTTTTTN
B2	v3_gr4	TACCATG	CGATTGAGGCCGGTAATACGACTCACTATAGGGGCGACGTGTGCTCTTCCGATCTTACCATGNNNNNNNNTTTTTTTTTTTTTTTTTTTTN
C2	v3_gr4	GTTCGGA	CGATTGAGGCCGGTAATACGACTCACTATAGGGGCGACGTGTGCTCTTCCGATCTGTTCGGANNNNNNNNTTTTTTTTTTTTTTTTTTTTN
D2	v3_gr4	TGGTACC	CGATTGAGGCCGGTAATACGACTCACTATAGGGGCGACGTGTGCTCTTCCGATCTTGGTACCNNNNNNNNTTTTTTTTTTTTTTTTTTTTN
E2	v3_gr4	CTGTCAT	CGATTGAGGCCGGTAATACGACTCACTATAGGGGCGACGTGTGCTCTTCCGATCTCTGTCATNNNNNNNNTTTTTTTTTTTTTTTTTTTTN
F2	v3_gr4	GAGTCTT	CGATTGAGGCCGGTAATACGACTCACTATAGGGGCGACGTGTGCTCTTCCGATCTGAGTCTTNNNNNNNNTTTTTTTTTTTTTTTTTTTTN
G2	v3_gr4	GCTAGAA	CGATTGAGGCCGGTAATACGACTCACTATAGGGGCGACGTGTGCTCTTCCGATCTGCTAGAANNNNNNNNTTTTTTTTTTTTTTTTTTTTN
H2	v3_gr4	CGACACT	CGATTGAGGCCGGTAATACGACTCACTATAGGGGCGACGTGTGCTCTTCCGATCTCGACACTNNNNNNNNTTTTTTTTTTTTTTTTTTTTN
A3	v3_gr4	AGGTCTG	CGATTGAGGCCGGTAATACGACTCACTATAGGGGCGACGTGTGCTCTTCCGATCTAGGTCTGNNNNNNNNTTTTTTTTTTTTTTTTTTTTN
B3	v3_gr4	CGAATTC	CGATTGAGGCCGGTAATACGACTCACTATAGGGGCGACGTGTGCTCTTCCGATCTCGAATTCNNNNNNNNTTTTTTTTTTTTTTTTTTTTN
C3	v3_gr4	TAGCGTG	CGATTGAGGCCGGTAATACGACTCACTATAGGGGCGACGTGTGCTCTTCCGATCTTAGCGTGNNNNNNNNTTTTTTTTTTTTTTTTTTTTN
D3	v3_gr4	ATGTGCC	CGATTGAGGCCGGTAATACGACTCACTATAGGGGCGACGTGTGCTCTTCCGATCTATGTGCCNNNNNNNNTTTTTTTTTTTTTTTTTTTTN
E3	v3_gr4	AGTGAGC	CGATTGAGGCCGGTAATACGACTCACTATAGGGGCGACGTGTGCTCTTCCGATCTAGTGAGCNNNNNNNNTTTTTTTTTTTTTTTTTTTTN
F3	v3_gr4	TAGGTGC	CGATTGAGGCCGGTAATACGACTCACTATAGGGGCGACGTGTGCTCTTCCGATCTTAGGTGCNNNNNNNNTTTTTTTTTTTTTTTTTTTTN
G3	v3_gr4	AGTTGCA	CGATTGAGGCCGGTAATACGACTCACTATAGGGGCGACGTGTGCTCTTCCGATCTAGTTGCANNNNNNNNTTTTTTTTTTTTTTTTTTTTN
H3	v3_gr4	GTGGTAC	CGATTGAGGCCGGTAATACGACTCACTATAGGGGCGACGTGTGCTCTTCCGATCTGTGGTACNNNNNNNNTTTTTTTTTTTTTTTTTTTTN
A4	v3_gr4	ATTCCAG	CGATTGAGGCCGGTAATACGACTCACTATAGGGGCGACGTGTGCTCTTCCGATCTATTCCAGNNNNNNNNTTTTTTTTTTTTTTTTTTTTN
B4	v3_gr4	ACGTCAA	CGATTGAGGCCGGTAATACGACTCACTATAGGGGCGACGTGTGCTCTTCCGATCTACGTCAANNNNNNNNTTTTTTTTTTTTTTTTTTTTN
C4	v3_gr4	CTGATCA	CGATTGAGGCCGGTAATACGACTCACTATAGGGGCGACGTGTGCTCTTCCGATCTCTGATCANNNNNNNNTTTTTTTTTTTTTTTTTTTTN
D4	v3_gr4	CTGTGGA	CGATTGAGGCCGGTAATACGACTCACTATAGGGGCGACGTGTGCTCTTCCGATCTCTGTGGANNNNNNNNTTTTTTTTTTTTTTTTTTTTN
E4	v3_gr4	TAAGGCT	CGATTGAGGCCGGTAATACGACTCACTATAGGGGCGACGTGTGCTCTTCCGATCTTAAGGCTNNNNNNNNTTTTTTTTTTTTTTTTTTTTN
F4	v3_gr4	CTATGCC	CGATTGAGGCCGGTAATACGACTCACTATAGGGGCGACGTGTGCTCTTCCGATCTCTATGCCNNNNNNNNTTTTTTTTTTTTTTTTTTTTN
G4	v3_gr4	GTTAGCG	CGATTGAGGCCGGTAATACGACTCACTATAGGGGCGACGTGTGCTCTTCCGATCTGTTAGCGNNNNNNNNTTTTTTTTTTTTTTTTTTTTN
H4	v3_gr4	GAGGATC	CGATTGAGGCCGGTAATACGACTCACTATAGGGGCGACGTGTGCTCTTCCGATCTGAGGATCNNNNNNNNTTTTTTTTTTTTTTTTTTTTN
A5	v3_gr4	CCGTGTA	CGATTGAGGCCGGTAATACGACTCACTATAGGGGCGACGTGTGCTCTTCCGATCTCCGTGTANNNNNNNNTTTTTTTTTTTTTTTTTTTTN
B5	v3_gr4	CTGTCCA	CGATTGAGGCCGGTAATACGACTCACTATAGGGGCGACGTGTGCTCTTCCGATCTCTGTCCANNNNNNNNTTTTTTTTTTTTTTTTTTTTN
C5	v3_gr4	TCACAGT	CGATTGAGGCCGGTAATACGACTCACTATAGGGGCGACGTGTGCTCTTCCGATCTTCACAGTNNNNNNNNTTTTTTTTTTTTTTTTTTTTN
D5	v3_gr4	TCAACGT	CGATTGAGGCCGGTAATACGACTCACTATAGGGGCGACGTGTGCTCTTCCGATCTTCAACGTNNNNNNNNTTTTTTTTTTTTTTTTTTTTN
E5	v3_gr4	CAGTTGT	CGATTGAGGCCGGTAATACGACTCACTATAGGGGCGACGTGTGCTCTTCCGATCTCAGTTGTNNNNNNNNTTTTTTTTTTTTTTTTTTTTN
F5	v3_gr4	GTCAGTG	CGATTGAGGCCGGTAATACGACTCACTATAGGGGCGACGTGTGCTCTTCCGATCTGTCAGTGNNNNNNNNTTTTTTTTTTTTTTTTTTTTN
G5	v3_gr4	CTAGAGT	CGATTGAGGCCGGTAATACGACTCACTATAGGGGCGACGTGTGCTCTTCCGATCTCTAGAGTNNNNNNNNTTTTTTTTTTTTTTTTTTTTN
H5	v3_gr4	TGACACA	CGATTGAGGCCGGTAATACGACTCACTATAGGGGCGACGTGTGCTCTTCCGATCTTGACACANNNNNNNNTTTTTTTTTTTTTTTTTTTTN
A6	v3_gr4	ATCGCCA	CGATTGAGGCCGGTAATACGACTCACTATAGGGGCGACGTGTGCTCTTCCGATCTATCGCCANNNNNNNNTTTTTTTTTTTTTTTTTTTTN
B6	v3_gr4	ACTCTTG	CGATTGAGGCCGGTAATACGACTCACTATAGGGGCGACGTGTGCTCTTCCGATCTACTCTTGNNNNNNNNTTTTTTTTTTTTTTTTTTTTN
C6	v3_gr4	ATTGACG	CGATTGAGGCCGGTAATACGACTCACTATAGGGGCGACGTGTGCTCTTCCGATCTATTGACGNNNNNNNNTTTTTTTTTTTTTTTTTTTTN
D6	v3_gr4	AGCCTTC	CGATTGAGGCCGGTAATACGACTCACTATAGGGGCGACGTGTGCTCTTCCGATCTAGCCTTCNNNNNNNNTTTTTTTTTTTTTTTTTTTTN
E6	v3_gr4	GAATCTG	CGATTGAGGCCGGTAATACGACTCACTATAGGGGCGACGTGTGCTCTTCCGATCTGAATCTGNNNNNNNNTTTTTTTTTTTTTTTTTTTTN
F6	v3_gr4	GTCACTA	CGATTGAGGCCGGTAATACGACTCACTATAGGGGCGACGTGTGCTCTTCCGATCTGTCACTANNNNNNNNTTTTTTTTTTTTTTTTTTTTN
G6	v3_gr4	TAGTGGC	CGATTGAGGCCGGTAATACGACTCACTATAGGGGCGACGTGTGCTCTTCCGATCTTAGTGGCNNNNNNNNTTTTTTTTTTTTTTTTTTTTN
H6	v3_gr4	AGGAGTC	CGATTGAGGCCGGTAATACGACTCACTATAGGGGCGACGTGTGCTCTTCCGATCTAGGAGTCNNNNNNNNTTTTTTTTTTTTTTTTTTTTN
A7	v3_gr4	ATGCGCA	CGATTGAGGCCGGTAATACGACTCACTATAGGGGCGACGTGTGCTCTTCCGATCTATGCGCANNNNNNNNTTTTTTTTTTTTTTTTTTTTN
B7	v3_gr4	CTACGAT	CGATTGAGGCCGGTAATACGACTCACTATAGGGGCGACGTGTGCTCTTCCGATCTCTACGATNNNNNNNNTTTTTTTTTTTTTTTTTTTTN
C7	v3_gr4	ATGTCGC	CGATTGAGGCCGGTAATACGACTCACTATAGGGGCGACGTGTGCTCTTCCGATCTATGTCGCNNNNNNNNTTTTTTTTTTTTTTTTTTTTN
D7	v3_gr4	GTAACTG	CGATTGAGGCCGGTAATACGACTCACTATAGGGGCGACGTGTGCTCTTCCGATCTGTAACTGNNNNNNNNTTTTTTTTTTTTTTTTTTTTN
E7	v3_gr4	AGTCAGT	CGATTGAGGCCGGTAATACGACTCACTATAGGGGCGACGTGTGCTCTTCCGATCTAGTCAGTNNNNNNNNTTTTTTTTTTTTTTTTTTTTN
F7	v3_gr4	TAGACGC	CGATTGAGGCCGGTAATACGACTCACTATAGGGGCGACGTGTGCTCTTCCGATCTTAGACGCNNNNNNNNTTTTTTTTTTTTTTTTTTTTN
G7	v3_gr4	ACCAGTG	CGATTGAGGCCGGTAATACGACTCACTATAGGGGCGACGTGTGCTCTTCCGATCTACCAGTGNNNNNNNNTTTTTTTTTTTTTTTTTTTTN
H7	v3_gr4	CATCCGT	CGATTGAGGCCGGTAATACGACTCACTATAGGGGCGACGTGTGCTCTTCCGATCTCATCCGTNNNNNNNNTTTTTTTTTTTTTTTTTTTTN
A8	v3_gr4	GTTCATG	CGATTGAGGCCGGTAATACGACTCACTATAGGGGCGACGTGTGCTCTTCCGATCTGTTCATGNNNNNNNNTTTTTTTTTTTTTTTTTTTTN
B8	v3_gr4	CAGCGAT	CGATTGAGGCCGGTAATACGACTCACTATAGGGGCGACGTGTGCTCTTCCGATCTCAGCGATNNNNNNNNTTTTTTTTTTTTTTTTTTTTN
C8	v3_gr4	ACTACTG	CGATTGAGGCCGGTAATACGACTCACTATAGGGGCGACGTGTGCTCTTCCGATCTACTACTGNNNNNNNNTTTTTTTTTTTTTTTTTTTTN
D8	v3_gr4	TGGATGC	CGATTGAGGCCGGTAATACGACTCACTATAGGGGCGACGTGTGCTCTTCCGATCTTGGATGCNNNNNNNNTTTTTTTTTTTTTTTTTTTTN
E8	v3_gr4	GAAGTCC	CGATTGAGGCCGGTAATACGACTCACTATAGGGGCGACGTGTGCTCTTCCGATCTGAAGTCCNNNNNNNNTTTTTTTTTTTTTTTTTTTTN
F8	v3_gr4	GATTCAG	CGATTGAGGCCGGTAATACGACTCACTATAGGGGCGACGTGTGCTCTTCCGATCTGATTCAGNNNNNNNNTTTTTTTTTTTTTTTTTTTTN
G8	v3_gr4	AGGCATG	CGATTGAGGCCGGTAATACGACTCACTATAGGGGCGACGTGTGCTCTTCCGATCTAGGCATGNNNNNNNNTTTTTTTTTTTTTTTTTTTTN
H8	v3_gr4	AGATCGA	CGATTGAGGCCGGTAATACGACTCACTATAGGGGCGACGTGTGCTCTTCCGATCTAGATCGANNNNNNNNTTTTTTTTTTTTTTTTTTTTN
A9	v3_gr4	TCTAGTC	CGATTGAGGCCGGTAATACGACTCACTATAGGGGCGACGTGTGCTCTTCCGATCTTCTAGTCNNNNNNNNTTTTTTTTTTTTTTTTTTTTN
B9	v3_gr4	GCGTTAG	CGATTGAGGCCGGTAATACGACTCACTATAGGGGCGACGTGTGCTCTTCCGATCTGCGTTAGNNNNNNNNTTTTTTTTTTTTTTTTTTTTN
C9	v3_gr4	TAGAGCC	CGATTGAGGCCGGTAATACGACTCACTATAGGGGCGACGTGTGCTCTTCCGATCTTAGAGCCNNNNNNNNTTTTTTTTTTTTTTTTTTTTN
D9	v3_gr4	TGCGTAT	CGATTGAGGCCGGTAATACGACTCACTATAGGGGCGACGTGTGCTCTTCCGATCTTGCGTATNNNNNNNNTTTTTTTTTTTTTTTTTTTTN
E9	v3_gr4	GGACTAA	CGATTGAGGCCGGTAATACGACTCACTATAGGGGCGACGTGTGCTCTTCCGATCTGGACTAANNNNNNNNTTTTTTTTTTTTTTTTTTTTN
F9	v3_gr4	TGACATG	CGATTGAGGCCGGTAATACGACTCACTATAGGGGCGACGTGTGCTCTTCCGATCTTGACATGNNNNNNNNTTTTTTTTTTTTTTTTTTTTN
G9	v3_gr4	TTAGGCA	CGATTGAGGCCGGTAATACGACTCACTATAGGGGCGACGTGTGCTCTTCCGATCTTTAGGCANNNNNNNNTTTTTTTTTTTTTTTTTTTTN
H9	v3_gr4	GAGCTGA	CGATTGAGGCCGGTAATACGACTCACTATAGGGGCGACGTGTGCTCTTCCGATCTGAGCTGANNNNNNNNTTTTTTTTTTTTTTTTTTTTN
A10	v3_gr4	ACGGTAG	CGATTGAGGCCGGTAATACGACTCACTATAGGGGCGACGTGTGCTCTTCCGATCTACGGTAGNNNNNNNNTTTTTTTTTTTTTTTTTTTTN
B10	v3_gr4	TGCCAGA	CGATTGAGGCCGGTAATACGACTCACTATAGGGGCGACGTGTGCTCTTCCGATCTTGCCAGANNNNNNNNTTTTTTTTTTTTTTTTTTTTN
C10	v3_gr4	TCCATGC	CGATTGAGGCCGGTAATACGACTCACTATAGGGGCGACGTGTGCTCTTCCGATCTTCCATGCNNNNNNNNTTTTTTTTTTTTTTTTTTTTN
D10	v3_gr4	CACCTAG	CGATTGAGGCCGGTAATACGACTCACTATAGGGGCGACGTGTGCTCTTCCGATCTCACCTAGNNNNNNNNTTTTTTTTTTTTTTTTTTTTN
E10	v3_gr4	GCTCTAA	CGATTGAGGCCGGTAATACGACTCACTATAGGGGCGACGTGTGCTCTTCCGATCTGCTCTAANNNNNNNNTTTTTTTTTTTTTTTTTTTTN
F10	v3_gr4	CGGTTAT	CGATTGAGGCCGGTAATACGACTCACTATAGGGGCGACGTGTGCTCTTCCGATCTCGGTTATNNNNNNNNTTTTTTTTTTTTTTTTTTTTN
G10	v3_gr4	GTCCAAG	CGATTGAGGCCGGTAATACGACTCACTATAGGGGCGACGTGTGCTCTTCCGATCTGTCCAAGNNNNNNNNTTTTTTTTTTTTTTTTTTTTN
H10	v3_gr4	CTACCGA	CGATTGAGGCCGGTAATACGACTCACTATAGGGGCGACGTGTGCTCTTCCGATCTCTACCGANNNNNNNNTTTTTTTTTTTTTTTTTTTTN
A11	v3_gr4	CAAGTTG	CGATTGAGGCCGGTAATACGACTCACTATAGGGGCGACGTGTGCTCTTCCGATCTCAAGTTGNNNNNNNNTTTTTTTTTTTTTTTTTTTTN
B11	v3_gr4	ATCACGG	CGATTGAGGCCGGTAATACGACTCACTATAGGGGCGACGTGTGCTCTTCCGATCTATCACGGNNNNNNNNTTTTTTTTTTTTTTTTTTTTN
C11	v3_gr4	AAGACTC	CGATTGAGGCCGGTAATACGACTCACTATAGGGGCGACGTGTGCTCTTCCGATCTAAGACTCNNNNNNNNTTTTTTTTTTTTTTTTTTTTN
D11	v3_gr4	CGGTATT	CGATTGAGGCCGGTAATACGACTCACTATAGGGGCGACGTGTGCTCTTCCGATCTCGGTATTNNNNNNNNTTTTTTTTTTTTTTTTTTTTN
E11	v3_gr4	CGCCATT	CGATTGAGGCCGGTAATACGACTCACTATAGGGGCGACGTGTGCTCTTCCGATCTCGCCATTNNNNNNNNTTTTTTTTTTTTTTTTTTTTN
F11	v3_gr4	GTCCATA	CGATTGAGGCCGGTAATACGACTCACTATAGGGGCGACGTGTGCTCTTCCGATCTGTCCATANNNNNNNNTTTTTTTTTTTTTTTTTTTTN
G11	v3_gr4	TCCTGTA	CGATTGAGGCCGGTAATACGACTCACTATAGGGGCGACGTGTGCTCTTCCGATCTTCCTGTANNNNNNNNTTTTTTTTTTTTTTTTTTTTN
H11	v3_gr4	TCGTAGC	CGATTGAGGCCGGTAATACGACTCACTATAGGGGCGACGTGTGCTCTTCCGATCTTCGTAGCNNNNNNNNTTTTTTTTTTTTTTTTTTTTN
A12	v3_gr4	TAGCCGA	CGATTGAGGCCGGTAATACGACTCACTATAGGGGCGACGTGTGCTCTTCCGATCTTAGCCGANNNNNNNNTTTTTTTTTTTTTTTTTTTTN
B12	v3_gr4	TGGCTAT	CGATTGAGGCCGGTAATACGACTCACTATAGGGGCGACGTGTGCTCTTCCGATCTTGGCTATNNNNNNNNTTTTTTTTTTTTTTTTTTTTN
C12	v3_gr4	TTACTGC	CGATTGAGGCCGGTAATACGACTCACTATAGGGGCGACGTGTGCTCTTCCGATCTTTACTGCNNNNNNNNTTTTTTTTTTTTTTTTTTTTN
D12	v3_gr4	GGACATT	CGATTGAGGCCGGTAATACGACTCACTATAGGGGCGACGTGTGCTCTTCCGATCTGGACATTNNNNNNNNTTTTTTTTTTTTTTTTTTTTN
E12	v3_gr4	ATTCAGC	CGATTGAGGCCGGTAATACGACTCACTATAGGGGCGACGTGTGCTCTTCCGATCTATTCAGCNNNNNNNNTTTTTTTTTTTTTTTTTTTTN
F12	v3_gr4	ATTCGCG	CGATTGAGGCCGGTAATACGACTCACTATAGGGGCGACGTGTGCTCTTCCGATCTATTCGCGNNNNNNNNTTTTTTTTTTTTTTTTTTTTN
G12	v3_gr4	TGAAGCT	CGATTGAGGCCGGTAATACGACTCACTATAGGGGCGACGTGTGCTCTTCCGATCTTGAAGCTNNNNNNNNTTTTTTTTTTTTTTTTTTTTN
H12	v3_gr4	CACGTAT	CGATTGAGGCCGGTAATACGACTCACTATAGGGGCGACGTGTGCTCTTCCGATCTCACGTATNNNNNNNNTTTTTTTTTTTTTTTTTTTTN
