# Supplementary material for: MARS-seq2.0: an experimental and analytical pipeline for indexed sorting combined with single-cell RNA sequencing
Source: Springer Nature journal article supplement (doi:10.1038/s41596-019-0164-4), 2019-05-17
Supplement: MOESM5 [file 41596_2019_164_MOESM5_ESM.xlsx]

## Sheet: MARS-seq2.0_Ligation adapter
Plate barcode name	Barcode ligation	Seq barcode	Read
lig_N5X4_ix1	/5Phos/GACTNNNNNAGATCGGAAGAGCGTCGTGTAG/3SpC3/	AGTC	NNNNNAGTC
lig_N5X4_ix2	/5Phos/CATGNNNNNAGATCGGAAGAGCGTCGTGTAG/3SpC3/	CATG	NNNNNCATG
lig_N5X4_ix3	/5Phos/CCAANNNNNAGATCGGAAGAGCGTCGTGTAG/3SpC3/	TTGG	NNNNNTTGG
lig_N5X4_ix4	/5Phos/CTGTNNNNNAGATCGGAAGAGCGTCGTGTAG/3SpC3/	ACAG	NNNNNACAG
lig_N5X4_ix5	/5Phos/GTAGNNNNNAGATCGGAAGAGCGTCGTGTAG/3SpC3/	CTAC	NNNNNCTAC
lig_N5X4_ix6	/5Phos/TGATNNNNNAGATCGGAAGAGCGTCGTGTAG/3SpC3/	ATCA	NNNNNATCA
lig_N5X4_ix7	/5Phos/ATCANNNNNAGATCGGAAGAGCGTCGTGTAG/3SpC3/	TGAT	NNNNNTGAT
lig_N5X4_ix8	/5Phos/TAGANNNNNAGATCGGAAGAGCGTCGTGTAG/3SpC3/	TCTA	NNNNNTCTA
lig_N5X4_ix9	/5Phos/AAGTNNNNNAGATCGGAAGAGCGTCGTGTAG/3SpC3/	ACTT	NNNNNACTT
lig_N5X4_ix10	/5Phos/GGCGNNNNNAGATCGGAAGAGCGTCGTGTAG/3SpC3/	CGCC	NNNNNCGCC
lig_N5X4_ix11	/5Phos/GTTTNNNNNAGATCGGAAGAGCGTCGTGTAG/3SpC3/	AAAC	NNNNNAAAC
lig_N5X4_ix12	/5Phos/GCGCNNNNNAGATCGGAAGAGCGTCGTGTAG/3SpC3/	GCGC	NNNNNGCGC
lig_N5X4_ix13	/5Phos/GAAANNNNNAGATCGGAAGAGCGTCGTGTAG/3SpC3/	TTTC	NNNNNTTTC
lig_N5X4_ix14	/5Phos/TACCNNNNNAGATCGGAAGAGCGTCGTGTAG/3SpC3/	GGTA	NNNNNGGTA
lig_N5X4_ix15	/5Phos/CGGANNNNNAGATCGGAAGAGCGTCGTGTAG/3SpC3/	TCCG	NNNNNTCCG
lig_N5X4_ix16	/5Phos/CCCTNNNNNAGATCGGAAGAGCGTCGTGTAG/3SpC3/	AGGG	NNNNNAGGG
lig_N5X4_ix17	/5Phos/TCAGNNNNNAGATCGGAAGAGCGTCGTGTAG/3SpC3/	CTGA	NNNNNCTGA
lig_N5X4_ix18	/5Phos/CTCGNNNNNAGATCGGAAGAGCGTCGTGTAG/3SpC3/	CGAG	NNNNNCGAG
lig_N5X4_ix19	/5Phos/CTACNNNNNAGATCGGAAGAGCGTCGTGTAG/3SpC3/	GTAG	NNNNNGTAG
lig_N5X4_ix20	/5Phos/CTTANNNNNAGATCGGAAGAGCGTCGTGTAG/3SpC3/	TAAG	NNNNNTAAG
lig_N5X4_ix21	/5Phos/TGGCNNNNNAGATCGGAAGAGCGTCGTGTAG/3SpC3/	GCCA	NNNNNGCCA
lig_N5X4_ix22	/5Phos/AGCTNNNNNAGATCGGAAGAGCGTCGTGTAG/3SpC3/	AGCT	NNNNNAGCT
lig_N5X4_ix23	/5Phos/CAGCNNNNNAGATCGGAAGAGCGTCGTGTAG/3SpC3/	GCTG	NNNNNGCTG
lig_N5X4_ix24	/5Phos/ACTTNNNNNAGATCGGAAGAGCGTCGTGTAG/3SpC3/	AAGT	NNNNNAAGT
lig_N5X4_ix25	/5Phos/TCTANNNNNAGATCGGAAGAGCGTCGTGTAG/3SpC3/	TAGA	NNNNNTAGA
lig_N5X4_ix26	/5Phos/ACCGNNNNNAGATCGGAAGAGCGTCGTGTAG/3SpC3/	CGGT	NNNNNCGGT
lig_N5X4_ix27	/5Phos/ATGCNNNNNAGATCGGAAGAGCGTCGTGTAG/3SpC3/	GCAT	NNNNNGCAT
lig_N5X4_ix28	/5Phos/GATCNNNNNAGATCGGAAGAGCGTCGTGTAG/3SpC3/	GATC	NNNNNGATC
lig_N5X4_ix29	/5Phos/GGACNNNNNAGATCGGAAGAGCGTCGTGTAG/3SpC3/	GTCC	NNNNNGTCC
lig_N5X4_ix30	/5Phos/GTCCNNNNNAGATCGGAAGAGCGTCGTGTAG/3SpC3/	GGAC	NNNNNGGAC
lig_N5X4_ix31	/5Phos/CGAGNNNNNAGATCGGAAGAGCGTCGTGTAG/3SpC3/	CTCG	NNNNNCTCG
lig_N5X4_ix32	/5Phos/GCATNNNNNAGATCGGAAGAGCGTCGTGTAG/3SpC3/	ATGC	NNNNNATGC
